# Supplementary material for: Why scientific societies should involve more early-career researchers
Source: eLife. 2020 Sep 23;9:e60829. doi: 10.7554/eLife.60829 (PMC7511228; doi:10.7554/eLife.60829)
Supplement: Supplementary file 1. [file elife-60829-supp1.xlsx]

## Sheet: Sheet1
Society/organization	Societies interviewed	Number of Council/ Governing leadership positions	Number of ECR Council/ Governing Board leadership positions	Number of ECR leadership positions throughout organization	ECR attendance at board/council meetings (non-voting)	Voting ECR board position?	ECR committee or subcommittee	Your ECR definition (e.g. grad student/postdoc/junior PI?)
American Association for Anatomy (AAA)	✓	118	2	21	Yes	Yes	Committee for Early-Career Anatomists (CECA)
American Association for the Advancement of Science (AAAS)		100	0	0	None identified	None identified	None identified
American Chemical Society (ACS)		16	0	0	None identified	None identified	None identified
American Institute of Physics (AIP)		16	0	0	None identified	None identified	None identified
American Physiological Society (APS)	✓	13	0	0	No	None identified	Trainee Advisory Committee
American Society for Biochemistry and Molecular Biology (ASBMB)	✓	28	0	0	None identified	None identified	None identified
American Society for Cell Biology (ASCB)	✓	n/a	n/a	n/a	Yes	None identified	Committee for Postdocs and Students (COMPASS)
American Society for Investigative Pathology (ASIP)		n/a	n/a	n/a	None identified	Yes	None identified
American Society of Microbiology (ASM)	✓	14	1	n/a	None identified	One identified
Association for Molecular Pathology (AMP)		18	0	21	No	None identified	None identified	Associate Members (students, postdocs, fellows) & Early Career (first few years of practice; some committees only)
American Society for Nutrition (ASN)		17	0	0	No	None identified	Early Career Interest Group	Advanced Graduate Students: Individuals in their final years of advanced (masters, doctoral) studies; Early Professionals: Individuals holding a professional degree (obtained within the past 5 years); Postdoctoral Trainees: Individuals holding a doctoral degree (obtained within the past 5 years).; Medical Interns, Residents, or Fellows: Individuals engaged in final stages of graduate medical trai…
American Society for Pharmacology and Experimental Therapeutics (ASPET)	✓	n/a	n/a	n/a	No	No	Young Scientists Committee
American Society of Plant Biologists (ASPB)	✓	110	2	17	Yes	Updated 28/10/20: ASPB has a voting ECR board position	Early Career Plant Scientists Section	Anyone who self-identifies as an ECR & is currently going through or graduated within 10 years of any plant-science (or related) degree.
British Society for Neuroendocrinology		17	2	n/a	Yes	Yes	None identified
European Society of Endocrinology		n/a	n/a	n/a	Yes	None identified	European Young Endocrine Scientists
Genetics Society of America (GSA)	✓	19	1	138	Yes	No	Early Career Scientist Leadership Program	Grad students, postdocs, junior faculty (academia); scientific professionals less than or equal to 10-years post graduate training or PhD completion.
Organization for Human Brain Mapping		n/a	n/a	n/a	None identified	None identified	OHBM Student and Postdoc Special Interest Group
Society for Neuroscience (SfN)		16	0	n/a	None identified	None identified	Trainee Advisory Committee
Society for the Neurobiology of Language (SNL)	✓	13	1	1	Yes	Yes	None identified	Student/Postdoc Representative
The Physiological Society		17	0	2	Yes	None identified	None identified	Grad students, postdocs, research associates
